# Supplementary material for: Biological effects and bioaccumulation of pharmaceutically active compounds in crucian carp caged near the outfall of a sewage treatment plant
Source: Royal Society of Chemistry journal article supplement (doi:10.1039/c4em00472h), 2014-10-22
Supplement: c4em00472h1.pdf [file c4em00472h1.pdf]

1 **Supplemental Material:**

2

---

**Content:**

---

|      |                                                                                                     |
|------|-----------------------------------------------------------------------------------------------------|
| SM-1 | <b>2. Materials and methods</b>                                                                     |
| SM-2 | Table S1. Mobile phase compositions for the two separation methods.                                 |
| SM-3 | Table S2. Optimized MS/MS parameters for the eight PhACs.                                           |
| SM-4 | Table S3. Acute and chronic toxicity data of the PhACs on algae, daphnids and fish.                 |
| SM-5 | Table S4. Aquatic toxicity data for the five detected PhACs and the most sensitive aquatic species. |

---

3

4

5

6

7

8

9

10

11

12

13

14

15

16

17

## 18 2. Materials and methods

19

### 20 2.1. Materials and fish exposure

21 Eight PhACs were selected for this study based on their high usage rates and  
22 frequent occurrence in surface water in China.<sup>1,2</sup> The standards of roxithromycin  
23 (ROX), erythromycin (ERY), ketoconazole (KCZ), ibuprofen (IBU), diclofenac (DIC),  
24 propranolol (PRO), carbamazepine (CBZ) and 17 $\alpha$ -ethinylestradiol (EE2) were  
25 purchased from the laboratory of Dr. Ehrenstorfer (Augsburg, Germany).  
26 Erythromycin-13C,d3, carbamazepine-d10, ibuprofen-d3 and estrone-d4 were  
27 obtained from Sigma-Aldrich (Flanders, New Jersey, USA). Crucian carp were  
28 purchased from the Nanjing Institute of Fishery Science (Nanjing, China).

29 Crucian carp (*Carassius auratus*) is an important economic species widely  
30 distributed in the freshwaters of China. It has been demonstrated to be a very sensitive  
31 species to study the toxic effects of pollutants on aquatic organisms.<sup>3</sup> In the laboratory,  
32 the fish were fed every day with commercial fish food (6% of body weight/day).  
33 According to OECD guideline 305,<sup>4</sup> the exposure water's quality was checked daily  
34 and maintained at conditions suitable for crucian carp (Water temperatures  $9 \pm 1$  °C;  
35 pH  $7.4 \pm 0.3$ ; DO  $7.5 \pm 0.5$  and CaCO<sub>3</sub>  $110.5 \pm 3.5$  mg L<sup>-1</sup>). Feces and uneaten food  
36 were removed every day by suction. Natural light conditions were used throughout  
37 the experiment.

38

### 39 2.2. Biomarker assays, HSI, EROD and GST

40 Hepatosomatic index (HSI) was calculated as follow:  $HSI = (W_L/W_B) \times 100$ ,  
41 where  $W_L$  is the weight of the liver in grams and  $W_B$  is the body weight in grams.  
42 Liver samples were homogenized in nine volumes of cold buffer (0.15 M KCl, 0.1 M  
43 Tris-HCl, pH 7.4) and centrifuged for 25 min (10,000 $\times$ g) at 4 °C. The supernatants  
44 were used as the extract for enzymatic activity determination. The use of S9 fractions  
45 is convenient and relatively cheap compared with using cytosol and microsomes. The

EROD activity was determined at 572 nm using a microplate reader. Specifically, 10  $\mu\text{L}$  of supernatant, 140  $\mu\text{L}$  buffer (0.1 M Tris, 0.15 M KCl, pH 8.0) and 10  $\mu\text{L}$  of 2  $\mu\text{M}$  7-ethoxyresorufin were added to a 96-well microplate. The reaction was then initiated at 25 °C for 30 min by adding 40  $\mu\text{L}$  of 2.1  $\text{mg mL}^{-1}$  NADPH. NADPH was replaced by  $\text{H}_2\text{O}$  in the control wells. The molar extinction coefficient of the resorufin was 73  $\text{L mmol}^{-1} \text{cm}^{-1}$ . The EROD activity was expressed as  $\text{pmol mg pro}^{-1} \text{min}^{-1}$ . GST activity was determined at 340 nm by adapting to a microplate reader, using 30  $\mu\text{L}$  of homogenate and 150  $\mu\text{L}$  of the reaction solution (100  $\mu\text{L}$  of 0.1 mM potassium phosphate, 10  $\mu\text{L}$  of 1.0 mM 1-chloro-2,4-dinitrobenzene, 10  $\mu\text{L}$  of 1.0 mM GSH and 880  $\mu\text{L}$   $\text{H}_2\text{O}$ ) in microplates, and this activity was measured for 3 min. GST activity was expressed as  $\text{nmol mg pro}^{-1} \text{min}^{-1}$ .

57

### 58 2.3. Sample extraction

Tissue samples were extracted by pressurized liquid extraction (PLE) using a Dionex ASE 350 system (Thermo Fisher, Germering, Germany). Each tissue sample (1 g wet weight (ww) for muscle, gill and brain and 0.5 g ww for liver) was thoroughly mixed with hydromatrix and the mixture was put into a 22-mL stainless steel extraction cell containing a glass-fiber filter (27-mm diameter, type D28, Dionex) in the cell inlet and outlet. The extracting solvent was 100% methanol, and the operating conditions were as follows: extraction temperature, 70 °C; extraction pressure, 1500 psi; preheating period, 5 min; static extraction, 5 min; nitrogen purge, 180 s; and three static cycles.

Each PLE extract was concentrated to approximately 1 mL in a Büchi R200 (Labortechnik, Flawail, Switzerland) rotary evaporator set at 45 °C and 19600 Pa in a 50-mL round-bottomed flask. Then, the extract was transferred to a 15-mL conical tube and the round-bottomed flask was rinsed twice with 0.5 mL of methanol and evaporated to dryness using a multi-sample N-EVAP with a nitrogen stream and water bath at 50 °C. After solvent evaporation the extract was redissolved in 1 mL of acetonitrile, which has a low solubility for lipids. A freezing-lipid technique was applied, by means of redissolving the extract in acetonitrile and storing the extract in the freezer at -80 °C for 4 h. Most of the lipids precipitated out of solution and the extract was immediately centrifuged at 0 °C and 12000×g for 15 min. The supernatants were decanted into a chromatography bottle and reconstituted with 1 mL of acetonitrile, and 50 µL of the 1 mg L<sup>-1</sup> mixture containing the internal standards were added.

Water samples (500 mL) were passed through Oasis HLB 6cc SPE cartridges (500 mg, Waters, USA). The cartridges were preconditioned with 6 mL of methanol and 6 mL of water. The samples were eluted from the cartridges using 2 × 3 mL of methanol. The extracts were evaporated to dryness under a stream of nitrogen, reconstituted with 1 mL acetonitrile, and analyzed by UPLC/MS/MS.

#### **2.4. Instrumental analysis**

Liquid chromatography was performed on an Agilent 1290 ultra-high performance liquid chromatography (UPLC) system (Agilent Technologies) consisting of a binary pump, a micro-vacuum degasser, an autosampler equipped with

91 a 1200 bar injection valve and a column oven (set to 30 °C). Analytes were separated  
92 on an Eclipse Plus C18 (150 mm × 4.6 mm, 5 µm, Agilent Technologies) column  
93 preceded by a C18 guard column at a flow rate of 0.3 mL min<sup>-1</sup>. The injection volume  
94 was 5 µL. A binary gradient consisting of 0.1% (v/v) formic acid/0.02 mM  
95 ammonium acetate in water and 100% acetonitrile was employed to achieve  
96 separation as shown in Table S1. Detection was performed with an Agilent 6460 triple  
97 quadrupole mass spectrometer equipped with an electrospray ionization source (ESI).  
98 The ROX, ERY, KCZ, PRO and CBZ in the tissue and water samples were analyzed  
99 in the positive mode, whereas the DIC, IBU and EE2 were analyzed in the negative  
100 mode. The capillary voltage was held at 4 KV and the gas flow was set at 6 L min<sup>-1</sup>.  
101 The pressure of the nebulizing gas was 35 psi. The sheath gas temperature was held at  
102 350 °C and the gas flow was 9 L min<sup>-1</sup>. The triple quadrupole was used in the  
103 multiple-reaction monitoring (MRM) mode to identify and quantify the compounds.  
104 The collision energy, the fragmentor voltage, the precursor and the production ions  
105 optimized by the direct infusion of standard compounds are presented in Table S2.

106 Whole analytical procedures were monitored using strict quality assurance and  
107 control measures. The method sensitivity was calculated by determining the method  
108 detection limits (MDL), the limit of detection (LOD) and the limit of quantitation  
109 (LOQ) for the target compounds. The MDLs of the target compounds calculated using  
110 standard solutions were 0.05–0.12 ng L<sup>-1</sup>. For the water samples, the LODs and  
111 LOQs of the target compounds were 0.07–0.15 and 0.27–0.65 ng L<sup>-1</sup>, respectively.  
112 Similarly, the LODs and LOQs of the target compounds corresponding to fish tissues

113 were 0.1–0.3 and 0.4–1.2 ng g<sup>-1</sup>, respectively. Satisfactory recoveries were obtained  
114 for the target compounds in the range of 83.7–105.2% for the water samples and  
115 62.4–83.6% for the fish samples.

116

## 117 **2.5. Environmental implications**

118 An environmental risk assessment of individual pharmaceuticals was performed  
119 based on chronic data and acute data according to the EMA guideline and REACH  
120 guideline<sup>5</sup>, respectively. Typically, the risk quotient (RQ) of individual  
121 pharmaceuticals is calculated via their measured environmental concentration (MEC)  
122 divided by the predicted no-effect concentration (PNEC), as shown in Equation (1):

$$123 \quad RQ = \frac{MEC}{PNEC} \quad (1)$$

124 According to the REACH guidance document, to estimate a PNEC on the basis of  
125 toxicity data, when only the short-term/acute toxicity data EC50 or LC50 are  
126 available, the calculation of PNEC is obtained from the EC50 or LC50 divided by an  
127 assessment factor (AF) of 1000. Once the long-term/chronic NOEC values for one,  
128 two or three trophic levels are available, an AF of 100, 50 or 10 is used.<sup>5</sup> In this study,  
129 an AF of 1000, 100 or 10 was used in relation to the toxicity of PhACs. In this study,  
130 the acute or chronic toxicity data of the detected PhACs on non-target organisms were  
131 collected from the literature and are shown in Table S3.

132 The environmental risk assessment of pharmaceutical mixtures was evaluated by  
133 the approach recently proposed by Backhaus and Faust. The approach for calculating  
134 the mixture RQ is outlined by Equation (2): the calculation of  $\Sigma RQ_{MEC/PNEC}$ , based on

135 the sum of MEC/PNEC values. The toxicity data EC50, LC50 or NOEC are  
 136 represented by EC50 in Equations (2).

$$\begin{aligned}
 137 \quad \Sigma RQ_{MEC/PNEC} &= \sum_{i=1}^n \frac{MEC_i}{PNEC_i} \\
 138 \quad &= \sum_{i=1}^n \frac{MEC_i}{\min (EC50_{aglse}, EC50_{daphnids}, EC50_{fish})_i \times (1/AF_i)} \\
 139 \quad &(2)
 \end{aligned}$$

140 The biomarker response data for each point were standardized according to  
 141 Eq.(3):

$$142 \quad Y_i = (X_i - m)/s \quad (3)$$

143 where  $Y_i$  is the standardized value of the biomarker,  $X_i$  is the mean value of a  
 144 biomarker at each point, and  $m$  and  $s$  are the mean value and the standard deviation of  
 145 a biomarker with all of the sampling points considered, respectively.

146 Using standardized data,  $Z_i$  was then calculated as  $Z_i = Y_i$  or  $Z_i = -Y_i$  in the case  
 147 of a biomarker responding to contamination by induction or inhibition, respectively.  
 148 The minimum value ( $\min Z_i$ ) for each biomarker at all of the points was calculated  
 149 from the standardized response value. The score of each biomarker response ( $S_i$ ) was  
 150 calculated as:

$$151 \quad S_i = Z_i + |\min Z_i| \quad (4)$$

152 Finally, to obtain an integrated multi-biomarker response, the EIBR value was  
 153 calculated as the sum of the weighting of the biomarker and the biomarker score as  
 154 follows:

$$EIBR = \frac{\sum_{i=1}^n S_i}{\sum_{i=1}^n W_i} \times \frac{\sum_{i=1}^n W_i}{\sum_{i=1}^n W_i} \quad (5)$$

where  $W_i$  is the weighting of each biomarker  $i$ , and molecular (EROD and GST) and physiological (HSI) biomarkers are weighted as 1 and 3, respectively, because it is assumed that an alteration at the physiological level would have a greater impact on the health of the organisms than changes at the molecular level.

**Table S1.**

| Time (min)    | Composition of the mobile phase (%)  |                          |
|---------------|--------------------------------------|--------------------------|
| Positive mode | Eluent A1 (0.1% (v/v) Formic acid)   | Eluent B1 (Acetonitrile) |
| 0             | 80                                   | 20                       |
| 0.5           | 80                                   | 20                       |
| 4             | 10                                   | 90                       |
| 5             | 10                                   | 90                       |
| 5.5           | 80                                   | 20                       |
| Negative mode | Eluent A2 (0.02 Mm Ammonium acetate) | Eluent B2 (Acetonitrile) |
| 0             | 80                                   | 20                       |
| 0.5           | 80                                   | 20                       |
| 6             | 5                                    | 95                       |
| 6.5           | 80                                   | 20                       |

**Table S2.**

| Compound | Precursor ion<br>(a) | Product ion<br>(a) | Fragmentor<br>voltage (v) | Collision energy<br>(v) | polarity |
|----------|----------------------|--------------------|---------------------------|-------------------------|----------|
| ROX      | 837                  | 679.6              | 140                       | 10                      | Positive |
| ERY      | 734.2                | 576.4              | 140                       | 20                      | Positive |
| KCZ      | 531.3                | 489.3              | 140                       | 5                       | Positive |
| PRO      | 260.2                | 116.2              | 120                       | 20                      | Positive |
| CBZ      | 237.2                | 194.2              | 140                       | 20                      | Positive |
| EE2      | 295                  | 145                | 160                       | 44                      | Negative |
| DIC      | 294.2                | 250                | 80                        | 6                       | Negative |
| IBU      | 205                  | 161                | 60                        | 0                       | Negative |

164

165

166

167

168

169

170 **Table S3.**

| Compound | Non-target organism                    | Toxicity data (mg L <sup>-1</sup> ) | Endpoint       | Toxicity | AF   | PNEC (ng L <sup>-1</sup> ) | Reference |
|----------|----------------------------------------|-------------------------------------|----------------|----------|------|----------------------------|-----------|
| ROX      | <i>Pseudokirchneriella subcapitata</i> | NOEC = 0.01                         | Growth         | Chronic  | 100  | 100                        | 6         |
|          | <i>Selenastrum capricornutum</i>       | EC50 = 4.0                          | Growth         | Acute    | 1000 | 4000                       | 7         |
|          | <i>Daphnia magna</i>                   | EC50 = 7.1                          | Immobilization | Acute    | 1000 | 7100                       | 8         |
|          | <i>Oryzias latipes</i>                 | LC50 = 288.3                        | Mortality      | Acute    | 1000 | 288300                     | 8         |
| ERY      | <i>Pseudokirchneriella subcapitata</i> | EC50 = 0.02                         | Growth         | Chronic  | 1000 | 20                         | 9         |
|          | <i>Selenastrum capricornutum</i>       | EC50 = 0.037                        | Growth         | Acute    | 1000 | 37                         | 10        |
|          | <i>Ceriodaphnia dubia</i>              | EC50 = 0.22                         | Growth         | Chronic  | 1000 | 220                        | 9         |
|          | <i>Ceriodaphnia dubia</i>              | EC50 = 10.23                        | Immobilization | Acute    | 1000 | 10230                      | 9         |
|          | <i>Oryzias latipes</i>                 | NOEC = 100                          | Growth         | Chronic  | 100  | 1000000                    | 11        |
|          | <i>Oryzias latipes</i>                 | LC50 > 100                          | Mortality      | Acute    | 1000 | 100000                     | 12        |
|          | <i>Pseudokirchneriella subcapitata</i> | NOEC > 10                           | Growth         | Chronic  | 100  | 100000                     | 13        |
| DIC      | <i>Pseudokirchneriella subcapitata</i> | EC50 = 16.3                         | Mobility       | Acute    | 1000 | 16300                      | 14        |
|          | <i>Ceriodaphnia dubia</i>              | NOEC = 1                            | Reproduction   | Chronic  | 100  | 10000                      | 13        |
|          | <i>Daphnia magna</i>                   | EC50 = 22.43                        | Immobilization | Acute    | 1000 | 22430                      | 14        |
|          | <i>Oncorhynchus mykiss</i>             | NOEC = 0.001                        | Cytotoxicity   | Chronic  | 100  | 10                         | 15        |
|          | <i>Oncorhynchus mykiss</i>             | LC50 = 5.6                          | Cytotoxicity   | Acute    | 1000 | 5600                       | 16        |
|          | <i>Cyclotella meneghiniana</i>         | NOEC = 0.094                        | Growth         | Chronic  | 100  | 940                        | 14        |
| PRO      | <i>Cyclotella meneghiniana</i>         | EC50 = 0.244                        | Growth         | Acute    | 1000 | 244                        | 14        |

|     |                                |               |                              |         |      |        |    |
|-----|--------------------------------|---------------|------------------------------|---------|------|--------|----|
| CBZ | <i>Ceriodaphnia dubia</i>      | NOEC = 0.009  | cytotoxicity                 | Chronic | 100  | 90     | 17 |
|     | <i>Ceriodaphnia dubia</i>      | LC50 = 0.8    | Reproduction                 | Acute   | 1000 | 800    | 18 |
|     | <i>Oryzias latipes</i>         | NOEC = 0.0005 | Reproduction                 | Chronic | 10   | 50     | 18 |
|     | <i>Oryzias latipes</i>         | LC50 = 11.4   | Mortality                    | Acute   | 1000 | 11400  | 12 |
|     | <i>Desmodesmus subspicatus</i> | EC50 = 74.0   | Growth                       | Chronic | 1000 | 74000  | 17 |
|     | <i>Cyclotella meneghiniana</i> | EC50 = 31.6   | Growth                       | Acute   | 1000 | 31600  | 14 |
|     | <i>Ceriodaphnia dubia</i>      | NOEC = 0.025  | Reproduction                 | Chronic | 100  | 250    | 13 |
|     | <i>Daphnia magna</i>           | EC50 = 13.8   | Mobility                     | Acute   | 1000 | 13800  | 13 |
|     | <i>Danio rerio</i>             | NOEC = 25     | Embryos and larvae mortality | Chronic | 100  | 250000 | 13 |
|     | <i>Oryzias latipes</i>         | LC50 = 45.87  | Mortality                    | Acute   | 1000 | 45870  | 12 |

171

172

173 **Table S4.**

| Compound | Non-target organism                    | Toxicity data<br>(mg L <sup>-1</sup> ) | Toxicity | AF   | PNEC<br>(ng L <sup>-1</sup> ) | Reference |
|----------|----------------------------------------|----------------------------------------|----------|------|-------------------------------|-----------|
| ROX      | <i>Pseudokirchneriella subcapitata</i> | NOEC = 0.01                            | Chronic  | 100  | 100                           | 6         |
| ERY      | <i>Pseudokirchneriella subcapitata</i> | EC50 = 0.02                            | Chronic  | 1000 | 20                            | 9         |
| PRO      | <i>Oryzias latipes</i>                 | NOEC = 0.0005                          | Chronic  | 10   | 50                            | 18        |
| CBZ      | <i>Ceriodaphnia dubia</i>              | NOEC = 0.025                           | Chronic  | 100  | 250                           | 13        |
| DIC      | <i>Oncorhynchus mykiss</i>             | NOEC = 0.001                           | Chronic  | 100  | 10                            | 15        |

174

175

176

177

178

179

180

181

182

183

184

185

186

## 187 **References**

188 1 Y. P. Duan, X. Z. Meng, Z. H. Wen, R. H. Ke, L. Chen, *Sci. Total Environ.*, 2013,  
189 447, 267-273.

190 2 G. Lu, X. Yang, Z. Li, H. Zhao, C. Wang, *Ecotoxicology*, 2013, 22, 50-59.

191 3 F. Chen, J. Gao, Q. Zhou, *Environ. Pollut.*, 2012, 162, 91-97.

192 4 OECD guideline for testing of chemicals. No. 305, *bioaccumulation in fish:*  
193 *aqueous and dietary exposure*. Paris, 2012.

194 5 ECHA, *Guidance on Information Requirements and Chemical Safety Assessment*  
195 *Chapter R. 10: Characterisation of Dose [Concentration]-Response for*  
196 *Environment*, 2008.

197 6 L. H. Yang, G. G. Ying, H. C. Su, J. L. Stauber, M. S. Adams, et al., *Environ.*  
198 *Toxicol. Chem.*, 2008, 27, 1201-1208.

199 7 H. Sanderson, D. J. Johnson, C. J. Wilson, R. A. Brain, K. R. Solomon, *Toxicol.*  
200 *Lett.*, 2003, 144, 383-395.

201 8 K. Choi, Y. Kim, J. Jung, M. H. Kim, C. S. Kim, N. H. Kim, et al., *Environ. Toxicol.*  
202 *Chem.*, 2008, 27, 711-719.

203 9 M. Isidori, M. Lavorgna, A. Nardelli, L. Pascarella, A. Parrella, *Sci. Total Environ.*,  
204 2005, 346, 87-98.

205 10 K. Eguchi, H. Nagase, M. Ozawa, Y. S. Endoh, K. Goto, K. Hirata, et al.,  
206 *Chemosphere*, 2004, 57, 1733-1738.

207 11 K. Ji, S. Kim, S. Han, J. Seo, S. Lee, Y. Park, et al., *Ecotoxicology*, 2012, 21,  
208 2031-2050.

- 209 12 J. W. Kim, H. Ishibashi, R. Yamauchi, N. Ichikawa, Y. Takao, M. Hirano, et al., *J.*  
210 *Toxicol. Sci.*, 2009, 34, 227-232.
- 211 13 B. T. Ferrari, N. Paxéus, R. L. Giudice, A. Pollio, J. Garric, *Ecotoxicol. Environ.*  
212 *Saf.*, 2003, 55, 359-370.
- 213 14 B. Ferrari, R. Mons, B. Vollat, B. Fraysse, N. Paxéus, R. L. Giudice, et al.,  
214 *Environ. Toxicol. Chem.*, 2004, 23, 1344-1354.
- 215 15 J. Schwaiger, H. Ferling, U. Mallow, H. Wintermayr, R. D. Negele, *Aquat.*  
216 *Toxicol.*, 2004, 68, 141-150.
- 217 16 N. Laville, S. Ait-Aïssa, E. Gomez, C. Casellas, J. Porcher, *Toxicology*, 2004, 196,  
218 41-55.
- 219 17 M. Crane, C. Watts, T. Boucard, *Sci. Total Environ.*, 2006, 367, 23-41.
- 220 18 D. B. Huggett, B. W. Brooks, B. Peterson, C. M. Foran, D. Schlenk, *Arch. Environ.*  
221 *Contam. Toxicol.*, 2002, 43, 229-235.
